# Supplementary material for: Racial and Ethnic Disparities in Childhood ADHD Treatment Access and Utilization: Results From a National Study
Source: Atypon-hosted journal article supplement (doi:10.1176/appi.ps.202100578), 2022-08-12
Supplement: appi.ps.202100578.ds001.pdf [file appi.ps.202100578.ds001.pdf]

Table S1. ADHD medications

| <b>Generic</b>                | <b>Brand names</b>                                                                                                               |
|-------------------------------|----------------------------------------------------------------------------------------------------------------------------------|
| Amphetamine                   | Adzenys, Dyanavel, Evekeo                                                                                                        |
| Dextroamphetamine             | Dexedrine, Focalin, Mydayis, ProCentra, Zenzedi                                                                                  |
| Amphetamine/dextroamphetamine | Adderall                                                                                                                         |
| Lisdexamfetamine              | Vyvanse                                                                                                                          |
| Methamphetamine               |                                                                                                                                  |
| Methylphenidate               | Adhansia, Aptensio, Concerta, Cotempla, Daytrana, Desoxyn, Jornay, Metadate, Methylin, Relexxii, Ritalin, QuilliChew, Quillivant |
| Atomoxetine                   | Strattera                                                                                                                        |
| Clonidine                     | Kapvay                                                                                                                           |
| Guanfacine                    | Intuniv                                                                                                                          |
| Other                         | Vayarin                                                                                                                          |

*Notes:* Data sources are the National Institute of Mental Health

(<https://www.nimh.nih.gov/health/topics/mental-health-medications/>), Healthline

(<https://www.healthline.com/health/adhd/medication-list>), and GoodRx (<https://www.goodrx.com/adhd/drugs>).

Table S2. RDE-concordant disparities in past-year ADHD-specific treatment access and utilization for Black, Hispanic, and Asian children ages 5-17 with ADHD, relative to access and utilization for White children

| Access                                       | White                 | Black     |               | Hispanic  |              | Asian     |                |
|----------------------------------------------|-----------------------|-----------|---------------|-----------|--------------|-----------|----------------|
|                                              | Predicted probability | Disparity | 95% CI        | Disparity | 95% CI       | Disparity | 95% CI         |
| Any ADHD-related visit                       | 50.4                  | -14.3***  | -19.5, -9.1   | -9.4***   | -14.3, -4.5  | -19.7**   | -34.4, -4.9    |
| Any ADHD medication prescription fill        | 40.3                  | -8.3**    | -13.9, -2.6   | -9.1***   | -13.4, -4.8  | -29.2***  | -36.9, -21.4   |
| Utilization (among those with any use)       | Mean                  | Disparity | 95% CI        | Disparity | 95% CI       | Disparity | 95% CI         |
| Number of ADHD-related visits                | 6.1                   | 0.3       | -1.2, 1.9     | 1.1       | -0.2, 2.4    | 5.9       | -1.8, 13.6     |
| Number of ADHD medication prescription fills | 8.1                   | -1.1*     | -1.9, -0.4    | -0.5      | -1.4, 0.4    | -2.1      | -4.6, 0.4      |
| ADHD-related visit expenditures (\$)         | 655.5                 | -16.0     | -188.7, 156.6 | 164.7     | -35.3, 364.7 | 550.5     | -501.8, 1602.7 |

\*=p<0.05, \*\*=p<0.01, \*\*\*=p<0.001

RDE = residual direct effect. Models adjusted for age, sex, perceived mental health status, perceived physical health status, Columbia Impairment Scale score, region of residence, insurance status, and income. Sampling weights and survey nonresponse taken into account.

Table S3. RDE-concordant disparities in past-year mental health treatment access and expenditures for Black, Hispanic, and Asian children ages 5-17 with ADHD, relative to access and utilization for White children

|                                                               | White                 | Black     |             | Hispanic  |              | Asian     |                 |
|---------------------------------------------------------------|-----------------------|-----------|-------------|-----------|--------------|-----------|-----------------|
| Access                                                        | Predicted probability | Disparity | 95% CI      | Disparity | 95% CI       | Disparity | 95% CI          |
| Any mental health treatment                                   | 65.2                  | -14.0***  | -18.9, -9.0 | -10.2***  | -14.7, -5.8  | -25.9**   | -41.6, -10.2    |
| Utilization (among those with any use)                        | Mean                  | Disparity | 95% CI      | Disparity | 95% CI       | Disparity | 95% CI          |
| Total mental health treatment expenditures given any use (\$) | 2406.6                | -372.1    | -744.9, 0.7 | -327.1    | -737.9, 83.8 | 666.3     | -1474.0, 2806.6 |

\*=p<0.05, \*\*=p<0.01, \*\*\*=p<0.001

RDE = residual direct effect. Models adjusted for age, sex, perceived mental health status, perceived physical health status, Columbia Impairment Scale score, region of residence, insurance status, and income. Sampling weights and survey nonresponse taken into account. Mental health treatment includes all types of treatment (outpatient, inpatient, prescription) for any psychiatric diagnosis, including ADHD.

Table S4. IOM-concordant two-part generalized linear models for ADHD-specific treatment access and utilization (n=5,838).

|                               | Access                     |                                       | Utilization (among those with any use) |                                              |                                  |
|-------------------------------|----------------------------|---------------------------------------|----------------------------------------|----------------------------------------------|----------------------------------|
|                               | Any ADHD-specific visit    | Any ADHD medication prescription fill | Number of ADHD-specific visits         | Number of ADHD medication prescription fills | ADHD-specific visit expenditures |
|                               | Coefficient (95% CI)       | Coefficient (95% CI)                  | Coefficient (95% CI)                   | Coefficient (95% CI)                         | Coefficient (95% CI)             |
| <b>Race/ethnicity</b>         |                            |                                       |                                        |                                              |                                  |
| NH <sup>a</sup> white         | Ref                        | Ref                                   | Ref                                    | Ref                                          | Ref                              |
| NH Black                      | -0.66***<br>(-0.88, 0.44)  | -0.36**<br>(-0.60, -0.11)             | 0.06<br>(-0.22, 0.33)                  | -0.13*<br>(-0.23, -0.03)                     | -0.12<br>(-0.40, 0.17)           |
| Hispanic                      | -0.50***<br>(-0.71, -0.29) | -0.50***<br>(-0.70, -0.31)            | 0.09<br>(-0.09, 0.27)                  | -0.04<br>(-0.16, 0.07)                       | 0.11<br>(-0.13, 0.36)            |
| Asian                         | -0.94*<br>(-1.67, -0.21)   | -1.83***<br>(-2.56, -1.10)            | 0.64<br>(-0.14, 1.43)                  | -0.42*<br>(-0.79, -0.05)                     | 0.76<br>(-0.37, 1.89)            |
| Age (years)                   | -0.06***<br>(-0.09, -0.03) | -0.04*<br>(-0.56, -0.06)              | -0.03*<br>(-0.06, -0.01)               | -0.00<br>(-0.01, 0.01)                       | -0.03*<br>(-0.06, -0.00)         |
| <b>Sex</b>                    |                            |                                       |                                        |                                              |                                  |
| Male                          | Ref                        | Ref                                   | Ref                                    | Ref                                          | Ref                              |
| Female                        | 0.01<br>(-0.19, 0.21)      | 0.05<br>(-0.13, 0.24)                 | 0.09<br>(-0.14, 0.32)                  | -0.08<br>(-0.17, 0.00)                       | 0.16<br>(-0.09, 0.40)            |
| <b>Mental health status</b>   |                            |                                       |                                        |                                              |                                  |
| Excellent                     | Ref                        | Ref                                   | Ref                                    | Ref                                          | Ref                              |
| Very good                     | 0.30**<br>(0.10, 0.50)     | 0.08<br>(-0.13, 0.29)                 | 0.19<br>(-0.06, 0.44)                  | 0.19**<br>(0.06, 0.31)                       | 0.29*<br>(0.02, 0.56)            |
| Good                          | 0.48***<br>(0.25, 0.70)    | 0.24<br>(0.02, 0.47)                  | 0.29*<br>(0.06, 0.51)                  | 0.18**<br>(0.06, 0.30)                       | 0.39**<br>(0.13, 0.64)           |
| Fair                          | 0.80***<br>(0.48, 1.10)    | 0.20<br>(-0.09, 0.50)                 | 0.33*<br>(0.03, 0.63)                  | 0.17*<br>(0.02, 0.32)                        | 0.47**<br>(0.12, 0.83)           |
| Poor                          | 0.77**<br>(0.21, 1.32)     | 0.23<br>(-0.26, 0.73)                 | 0.49*<br>(0.08, 0.88)                  | 0.36**<br>(0.12, 0.61)                       | 0.55*<br>(0.11, 1.00)            |
| <b>Physical health status</b> |                            |                                       |                                        |                                              |                                  |
| Excellent                     | Ref                        | Ref                                   | Ref                                    | Ref                                          | Ref                              |
| Very good                     | -0.03<br>(-0.22, 0.15)     | -0.06<br>(-0.25, 0.14)                | 0.06<br>(-0.11, 0.23)                  | 0.04<br>(-0.07, 0.15)                        | 0.02<br>(-0.17, 0.21)            |
| Good                          | -0.02<br>(-0.25, 0.20)     | 0.03<br>(-0.20, 0.26)                 | 0.15<br>(-0.06, 0.37)                  | 0.08<br>(-0.03, 0.20)                        | 0.12<br>(-0.14, 0.38)            |
| Fair                          | -0.46**<br>(-0.80, -0.11)  | -0.32<br>(-0.68, 0.04)                | 0.11<br>(-0.27, 0.49)                  | -0.03<br>(-0.20, 0.13)                       | -0.17<br>(-0.67, 0.33)           |
| Poor                          | -0.11<br>(-0.74, 0.51)     | -0.42<br>(-1.19, 0.35)                | 0.30<br>(-0.45, 1.06)                  | -0.10<br>(-0.51, 0.30)                       | 0.12<br>(-0.74, 0.99)            |
| CIS score <sup>b</sup>        | 0.03***<br>(0.02, 0.04)    | 0.02***<br>(0.01, 0.03)               | 0.03***<br>(0.02, 0.04)                | 0.00<br>(-0.00, 0.01)                        | 0.03<br>(0.02, 0.04)             |

\*=p<0.05, \*\*=p<0.01, \*\*\*=p<0.001

<sup>a</sup>Non-Hispanic

<sup>b</sup>Columbia Impairment Scale score; possible scores range from 0-52 with higher score indicating more severe impairment

CI = confidence interval. IOM = Institute of Medicine. Coefficients and confidence intervals take into account sampling weights and survey nonresponse. Year of survey indicator variables were included in the regression models but not presented.

Table S5. IOM-concordant two-part generalized linear models for mental health treatment access and utilization for any psychiatric diagnosis, including ADHD (n=5,838).

|                        | Any mental health treatment | Total mental health treatment expenditures given any use |
|------------------------|-----------------------------|----------------------------------------------------------|
|                        | Coefficient (95% CI)        | Coefficient (95% CI)                                     |
| Race/ethnicity         |                             |                                                          |
| Non-Hispanic White     | Ref                         | Ref                                                      |
| Non-Hispanic Black     | -0.74*** (-0.95, -0.53)     | -0.22* (-0.40, -0.04)                                    |
| Hispanic               | -0.65*** (-0.84, -0.46)     | -0.18* (-0.36, -0.01)                                    |
| Asian                  | -1.24** (-1.96, -0.52)      | 0.13 (-0.48, 0.74)                                       |
| Age (years)            | -0.06*** (-0.09, -0.04)     | 0.02 (-0.01, 0.04)                                       |
| Sex                    |                             |                                                          |
| Male                   | Ref                         | Ref                                                      |
| Female                 | 0.11 (-0.08, 0.30)          | -0.01 (-0.01, 0.04)                                      |
| Mental health status   |                             |                                                          |
| Excellent              | Ref                         | Ref                                                      |
| Very good              | 0.26* (0.06, 0.47)          | 0.02 (-0.19, 0.23)                                       |
| Good                   | 0.54*** (0.32, 0.75)        | 0.17 (-0.04, 0.38)                                       |
| Fair                   | 1.21*** (0.88, 1.55)        | 0.25 (-0.06, 0.56)                                       |
| Poor                   | 1.11*** (0.49, 1.72)        | 0.75** (0.21, 1.28)                                      |
| Physical health status |                             |                                                          |
| Excellent              | Ref                         | Ref                                                      |
| Very good              | -0.02 (-0.22, 0.18)         | 0.03 (-0.12, 0.18)                                       |
| Good                   | -0.06 (-0.27, 0.15)         | 0.24 (-0.02, 0.49)                                       |
| Fair                   | -0.05 (-0.40, 0.29)         | -0.35* (-0.61, -0.08)                                    |
| Poor                   | -0.13 (-0.77, 0.50)         | 0.28 (-0.33, 0.89)                                       |
| CIS score <sup>a</sup> | 0.04*** (0.03, 0.05)        | 0.03*** (0.02, 0.04)                                     |

\*=p<0.05, \*\*=p<0.01, \*\*\*=p<0.001

<sup>a</sup>Columbia Impairment Scale score; possible scores range from 0-52 with higher score indicating more severe impairment

IOM = Institute of Medicine. Mental health treatment includes all types of treatment (outpatient, inpatient, prescription) for any psychiatric diagnosis, including ADHD. Coefficients and standard errors take into account sampling weights and survey nonresponse. Year of survey indicator variables were included in the regression models but not presented.

Table S6. RDE-concordant two-part generalized linear models for ADHD-specific treatment access and utilization (n=5,838).

|                               | Access                     |                                       | Utilization (among those with any use) |                                              |                                  |
|-------------------------------|----------------------------|---------------------------------------|----------------------------------------|----------------------------------------------|----------------------------------|
|                               | Any ADHD-specific visit    | Any ADHD medication prescription fill | Number of ADHD-specific visits         | Number of ADHD medication prescription fills | ADHD-specific visit expenditures |
|                               | Coefficient (95% CI)       | Coefficient (95% CI)                  | Coefficient (95% CI)                   | Coefficient (95% CI)                         | Coefficient (95% CI)             |
| <b>Race/ethnicity</b>         |                            |                                       |                                        |                                              |                                  |
| NH <sup>a</sup> white         | Ref                        | Ref                                   | Ref                                    | Ref                                          | Ref                              |
| NH Black                      | -0.63***<br>(-0.87, -0.40) | -0.38**<br>(-0.64, -0.11)             | 0.05<br>(-0.19, 0.30)                  | -0.15**<br>(-0.26, -0.05)                    | -0.02<br>(-0.29, 0.24)           |
| Hispanic                      | -0.41***<br>(-0.63, -0.19) | -0.42***<br>(-0.62, -0.21)            | 0.17<br>(-0.02, 0.36)                  | -0.06<br>(-0.19, 0.06)                       | 0.22<br>(-0.03, 0.48)            |
| Asian                         | -0.89*<br>(-1.63, -0.15)   | -1.74***<br>(-2.49, -0.99)            | 0.68*<br>(0.04, 1.32)                  | -0.30<br>(-0.73, 0.12)                       | 0.61<br>(-0.26, 1.48)            |
| Age (years)                   | -0.06***<br>(-0.09, -0.03) | -0.04**<br>(-0.07, -0.02)             | -0.03**<br>(-0.06, -0.01)              | 0.00<br>(-0.01, 0.02)                        | -0.03*<br>(-0.06, -0.00)         |
| <b>Sex</b>                    |                            |                                       |                                        |                                              |                                  |
| Male                          | Ref                        | Ref                                   | Ref                                    | Ref                                          | Ref                              |
| Female                        | 0.00<br>(-0.20, 0.20)      | 0.04<br>(-0.14, 0.23)                 | 0.09<br>(-0.13, 0.30)                  | -0.09*<br>(-0.17, -0.01)                     | 0.18<br>(-0.04, 0.39)            |
| <b>Mental health status</b>   |                            |                                       |                                        |                                              |                                  |
| Excellent                     | Ref                        | Ref                                   | Ref                                    | Ref                                          | Ref                              |
| Very good                     | 0.31**<br>(0.11, 0.51)     | 0.09<br>(-0.12, 0.31)                 | 0.23*<br>(0.01, 0.45)                  | 0.16**<br>(0.04, 0.27)                       | 0.34**<br>(0.10, 0.57)           |
| Good                          | 0.49***<br>(0.27-0.71)     | 0.26*<br>(0.04, 0.48)                 | 0.30**<br>(0.09, 0.52)                 | 0.13*<br>(0.02, 0.24)                        | 0.45***<br>(0.20, 0.69)          |
| Fair                          | 0.82***<br>(0.50-1.14)     | 0.21<br>(-0.09, 0.51)                 | 0.39**<br>(0.12, 0.66)                 | 0.13<br>(-0.01, 0.27)                        | 0.59***<br>(0.27, 0.91)          |
| Poor                          | 0.77**<br>(0.23, 1.32)     | 0.22<br>(-0.27, 0.72)                 | 0.55**<br>(0.18, 0.93)                 | 0.32**<br>(0.09, 0.56)                       | 0.72**<br>(0.31, 1.12)           |
| <b>Physical health status</b> |                            |                                       |                                        |                                              |                                  |
| Excellent                     | Ref                        | Ref                                   | Ref                                    | Ref                                          | Ref                              |
| Very good                     | -0.02<br>(-0.21, 0.17)     | -0.04<br>(-0.23, 0.15)                | 0.05<br>(-0.12, 0.21)                  | 0.02<br>(-0.09, 0.13)                        | 0.01<br>(-0.18, 0.20)            |
| Good                          | 0.02<br>(-0.20, 0.24)      | 0.05<br>(-0.18, 0.28)                 | 0.14<br>(-0.07, 0.36)                  | 0.04<br>(-0.07, 0.15)                        | 0.11<br>(-0.13, 0.35)            |
| Fair                          | -0.40<br>(-0.74, -0.05)    | -0.29<br>(-0.65, 0.08)                | 0.09<br>(-0.26, 0.43)                  | -0.08<br>(-0.25, 0.09)                       | -0.22<br>(-0.65, 0.20)           |
| Poor                          | -0.05<br>(-0.69, 0.58)     | -0.40<br>(-1.19, 0.39)                | 0.21<br>(-0.47, 0.89)                  | -0.15<br>(-0.53, 0.23)                       | -0.10<br>(-0.88, 0.68)           |
| CIS score <sup>b</sup>        | 0.03***<br>(0.02, 0.04)    | 0.02***<br>(0.01, 0.03)               | 0.02***<br>(0.01, 0.03)                | 0.00<br>(-0.00, 0.01)                        | 0.02***<br>(0.01, 0.04)          |

|                                   |                        |                           |                            |                        |                            |
|-----------------------------------|------------------------|---------------------------|----------------------------|------------------------|----------------------------|
| Region of residence               |                        |                           |                            |                        |                            |
| Northeast                         | Ref                    | Ref                       | Ref                        | Ref                    | Ref                        |
| Midwest                           | 0.17<br>(-0.18, 0.52)  | 0.03<br>(-0.30, 0.37)     | -0.04<br>(-0.32, 0.23)     | 0.01<br>(-0.14, 0.15)  | -0.24<br>(-0.56, 0.08)     |
| South                             | 0.10<br>(-0.22, 0.42)  | 0.15<br>(-0.16, 0.46)     | -0.39**<br>(-0.62, -0.15)  | -0.10<br>(-0.23, 0.03) | -0.49**<br>(-0.78, -0.19)  |
| West                              | -0.07<br>(-0.41, 0.26) | -0.22<br>(-0.60, 0.15)    | -0.62***<br>(-0.87, -0.37) | -0.04<br>(-0.24, 0.16) | -0.60***<br>(-0.90, -0.29) |
| Insurance status                  |                        |                           |                            |                        |                            |
| Private only                      | Ref                    | Ref                       | Ref                        | Ref                    | Ref                        |
| Public                            | 0.12<br>(-0.11, 0.35)  | 0.00<br>(-0.23, 0.23)     | 0.17<br>(-0.05, 0.39)      | 0.18**<br>(0.05, 0.31) | -0.15<br>(-0.42, 0.13)     |
| Other                             | 1.49<br>(-0.53, 3.52)  | 0.56<br>(-1.39, 2.51)     | 0.45*<br>(0.06, 0.84)      | 0.54*<br>(0.02, 1.06)  | 0.54<br>(-0.16, 1.24)      |
| Uninsured                         | -0.38<br>(-0.99, 0.23) | -0.79**<br>(-1.30, -0.28) | -0.21<br>(-0.52, 0.10)     | -0.27<br>(-0.72, 0.17) | -0.40<br>(-1.03, 0.23)     |
| Income (relative to poverty line) |                        |                           |                            |                        |                            |
| <100%                             | Ref                    | Ref                       | Ref                        | Ref                    | Ref                        |
| 100-124%                          | 0.17<br>(-0.16, 0.49)  | -0.06<br>(-0.41, 0.28)    | 0.23<br>(-0.06, 0.52)      | 0.09<br>(-0.08, 0.25)  | 0.33<br>(-0.01, 0.67)      |
| 125-200%                          | -0.08<br>(-0.33, 0.18) | -0.06<br>(-0.29, 0.17)    | -0.04<br>(-0.26, 0.19)     | 0.07<br>(-0.07, 0.20)  | 0.02<br>(-0.27, 0.31)      |
| 200-399%                          | 0.15<br>(-0.10, 0.40)  | -0.08<br>(-0.33, 0.18)    | 0.14<br>(-0.13, 0.40)      | 0.10<br>(-0.04, 0.23)  | 0.23<br>(-0.04, 0.51)      |
| >=400%                            | 0.42**<br>(0.10, 0.73) | 0.18<br>(-0.10, 0.52)     | 0.27<br>(-0.06, 0.59)      | -0.06<br>(-0.21, 0.09) | 0.24<br>(-0.10, 0.57)      |

\*=p<0.05, \*\*=p<0.01, \*\*\*=p<0.001

<sup>a</sup>Non-Hispanic

<sup>b</sup>Columbia Impairment Scale score; possible scores range from 0-52 with higher score indicating more severe impairment

RDE = residual direct effect. Coefficients and standard errors take into account sampling weights and survey nonresponse. Year of survey indicator variables were included in the regression models but not presented.



Table S7. RDE-concordant two-part generalized linear models for mental health treatment access and utilization for any psychiatric diagnosis, including ADHD (n=5,838)

|                                          | Any MH treatment        | Total MH treatment expenditures given any use |
|------------------------------------------|-------------------------|-----------------------------------------------|
|                                          | Coefficient (95% CI)    | Coefficient (95% CI)                          |
| <b>Race/ethnicity</b>                    |                         |                                               |
| Non-Hispanic White                       | Ref                     | Ref                                           |
| Non-Hispanic Black                       | -0.65*** (-0.88, -0.42) | -0.17 (-0.34, 0.01)                           |
| Hispanic                                 | -0.48*** (-0.69, -0.27) | -0.15 (-0.33, 0.03)                           |
| Asian                                    | -1.20** (-1.95, -0.45)  | 0.24 (-0.45, 0.94)                            |
| Age (years)                              | -0.07*** (-0.10, -0.04) | 0.01 (-0.01, 0.04)                            |
| <b>Sex</b>                               |                         |                                               |
| Male                                     | Ref                     | Ref                                           |
| Female                                   | 0.10 (-0.08, 0.29)      | -0.01 (-0.15, 0.13)                           |
| <b>Mental health status</b>              |                         |                                               |
| Excellent                                | Ref                     | Ref                                           |
| Very good                                | 0.28** (0.08, 0.48)     | 0.04 (-0.16, 0.23)                            |
| Good                                     | 0.58*** (0.37, 0.79)    | 0.18 (-0.02, 0.38)                            |
| Fair                                     | 1.28*** (0.96, 1.60)    | 0.27 (-0.03, 0.57)                            |
| Poor                                     | 1.14*** (0.54, 1.73)    | 0.80** (0.26, 1.33)                           |
| <b>Physical health status</b>            |                         |                                               |
| Excellent                                | Ref                     | Ref                                           |
| Very good                                | 0.02 (-0.17, 0.22)      | (0.05) (-0.10, 0.21)                          |
| Good                                     | 0.02 (-0.19, 0.24)      | 0.27* (0.02, 0.51)                            |
| Fair                                     | 0.06 (-0.29, 0.42)      | -0.29* (0.55, -0.03)                          |
| Poor                                     | -0.01 (-0.65, 0.63)     | 0.30 (-0.32, 0.92)                            |
| CIS score <sup>a</sup>                   | 0.04*** (0.03, 0.05)    | 0.03*** (0.02, 0.04)                          |
| <b>Region of residence</b>               |                         |                                               |
| Northeast                                | Ref                     | Ref                                           |
| Midwest                                  | 0.26 (-0.06, 0.59)      | -0.14 (-0.37, 0.10)                           |
| South                                    | 0.18 (-0.11, 0.47)      | -0.17 (-0.39, 0.05)                           |
| West                                     | -0.11 (-0.43, 0.20)     | -0.22 (-0.57, 0.12)                           |
| <b>Insurance status (%)</b>              |                         |                                               |
| Private only                             | Ref                     | Ref                                           |
| Public                                   | 0.00 (-0.24, 0.24)      | 0.04 (-0.14, 0.22)                            |
| Other                                    | 1.70 (-0.74, 4.12)      | 1.06 (-0.08, 2.21)                            |
| Uninsured                                | -0.57* (-1.09, -0.05)   | -0.50* (-0.95, -0.06)                         |
| <b>Income (relative to poverty line)</b> |                         |                                               |
| <100%                                    | Ref                     | Ref                                           |
| 100-124%                                 | 0.21 (-0.14, 0.55)      | 0.01 (-0.29, 0.30)                            |
| 125-200%                                 | 0.06 (-0.19, 0.31)      | 0.05 (-0.16, 0.26)                            |
| 200-399%                                 | 0.18 (-0.08, 0.44)      | 0.19 (-0.04, 0.41)                            |
| >=400%                                   | 0.66*** (0.34, 0.99)    | 0.23 (-0.00, 0.46)                            |

\*=p<0.05, \*\*=p<0.01, \*\*\*=p<0.001.

<sup>a</sup>Columbia Impairment Scale score; possible scores range from 0-52 with higher score indicating more severe impairment

RDE = residual direct effect. Mental health treatment includes all types of treatment (outpatient, inpatient, prescription) for any psychiatric diagnosis, including ADHD. Coefficients and standard errors take into account

sampling weights and survey nonresponse. Year of survey indicator variables were included in the regression models but not presented.
